# Supplementary material
Source: HighWire-hosted journal article supplement (https://sti.bmj.com/content/100/3/166)
Supplement: inline-supplementary-material-2 [file inline-supplementary-material-2.pdf]

## Supplementary material 2

**Table 1.** Distribution of the number of PrEP users and PrEP need (via the recent new HIV diagnosis proxy) in England during the pre- (PrEP Impact Trial – October 2017 to February 2020) and post-commissioning (2021) period of PrEP by age and gender (including gender and sexual orientation minorities)

| Age         | Gender                          | Pre-commissioning (Oct 2017 – Feb 2020) |                         |              |                                  | Post-commissioning (2021) |                         |               |                                  | Pre- to post-commissioning comparisons within groups | Pre- to post-commissioning comparisons across groups |
|-------------|---------------------------------|-----------------------------------------|-------------------------|--------------|----------------------------------|---------------------------|-------------------------|---------------|----------------------------------|------------------------------------------------------|------------------------------------------------------|
|             |                                 | PrEP users N (%)                        | Recent new HIV dx N (%) | PnR          | PnR relative difference (95% CI) | PrEP users N (%)          | Recent new HIV dx N (%) | PnR           | PnR relative difference (95% CI) | PnR relative difference (95% CI)                     | PnR relative difference (95% CI)                     |
| Overall     | Total                           | 21,292 (100.0%)                         | 703 (100.0%)            | 30.29        | N/A                              | 60,384 (100.0%)           | 148 (100.0%)            | 408.00        | N/A                              | 13.47* (11.28-16.09)                                 | N/A                                                  |
|             | Men, of which:                  | 20,626 (96.9%)                          | 601 (85.5%)             | 34.32        | Baseline group                   | 57,169 (94.7%)            | 122 (82.4%)             | 468.60        | Baseline group                   | 13.65* (11.23-16.60)                                 | Baseline group                                       |
|             | <i>MSM</i>                      | 20,349 (95.6%)                          | 474 (67.4%)             | 42.93        | N/A                              | 49,543 (82.0%)            | 74 (50.0%)              | 669.50        | N/A                              | 15.60* (12.20-19.93)                                 | N/A                                                  |
|             | <i>Heterosexual men</i>         | 277 (1.3%)                              | 127 (18.1%)             | 2.18         | N/A                              | 7,626 (12.6%)             | 48 (32.4%)              | 158.88        | N/A                              | 72.84* (51.17-103.68)                                | N/A                                                  |
|             | Women                           | 623 (2.9%)                              | 102 (14.5%)             | 6.11         | 0.18* (0.14-0.22)                | 1,198 (2.0%)              | 25 (16.9%)              | 47.92         | 0.10* (0.07-0.16)                | 7.85* (5.01-12.28)                                   | 0.57** (0.35-0.94)                                   |
|             | Transgender people <sup>1</sup> | 456 (2.1%)                              | 9 (1.3%)                | 50.67        | N/A                              | 527 (0.9%)                | 0 (0.0%)                | N/A           | N/A                              | N/A                                                  | N/A                                                  |
| 16 to 24    | Men                             | 2,973 (14.0%)                           | 107 (15.2%)             | 27.79        | Baseline group                   | 8,691 (14.4%)             | 19 (12.8%)              | 457.42        | Baseline group                   | 16.46* (10.09-26.86)                                 | Baseline group                                       |
|             | Women                           | 115 (0.5%)                              | 22 (3.1%)               | 5.23         | 0.19* (0.11-0.31)                | 261 (0.4%)                | 8 (5.4%)                | 32.63         | 0.07* (0.03-0.16)                | 6.24* (2.70-14.43)                                   | 0.38** (0.14-1.00)                                   |
|             | <b>Subtotal</b>                 | <b>3,104 (14.6%)</b>                    | <b>129 (18.3%)</b>      | <b>24.06</b> | <b>N/A</b>                       | <b>9,313 (15.4%)</b>      | <b>28 (18.9%)</b>       | <b>332.61</b> | <b>N/A</b>                       | <b>13.82* (9.17-20.84)</b>                           | <b>N/A</b>                                           |
| 25 to 34    | Men                             | 8,348 (39.2%)                           | 241 (34.3%)             | 34.64        | 1.25** (0.99-1.57)               | 23,603 (39.1%)            | 52 (35.1%)              | 453.90        | 0.99 (0.59-1.68)                 | 13.10* (9.70-17.70)                                  | 0.80 (0.45-1.41)                                     |
|             | Women                           | 251 (1.2%)                              | 26 (3.7%)               | 9.65         | 0.35* (0.22-0.54)                | 492 (0.8%)                | 6 (4.1%)                | 82.00         | 0.18* (0.07-0.45)                | 8.49* (3.45-20.91)                                   | 0.52 (0.19-1.44)                                     |
|             | <b>Subtotal</b>                 | <b>8,617 (40.5%)</b>                    | <b>267 (38.0%)</b>      | <b>32.27</b> | <b>N/A</b>                       | <b>24,830 (41.1%)</b>     | <b>58 (39.2%)</b>       | <b>428.10</b> | <b>N/A</b>                       | <b>13.26* (9.98-17.64)</b>                           | <b>N/A</b>                                           |
| 35 to 49    | Men                             | 6,832 (32.1%)                           | 181 (25.7%)             | 37.75        | 1.36** (1.07-1.73)               | 17,972 (29.8%)            | 34 (23.0%)              | 528.59        | 1.16 (0.66-2.03)                 | 14.00* (9.70-20.22)                                  | 0.85 (0.46-1.57)                                     |
|             | Women                           | 182 (0.9%)                              | 31 (4.4%)               | 5.87         | 0.21* (0.14-0.32)                | 348 (0.6%)                | 5 (3.4%)                | 69.60         | 0.15* (0.06-0.41)                | 11.86* (4.53-31.01)                                  | 0.72 (0.24-2.12)                                     |
|             | <b>Subtotal</b>                 | <b>7,021 (33.0%)</b>                    | <b>212 (30.2%)</b>      | <b>33.12</b> | <b>N/A</b>                       | <b>18,889 (31.3%)</b>     | <b>39 (26.4%)</b>       | <b>484.33</b> | <b>N/A</b>                       | <b>14.62* (10.38-20.60)</b>                          | <b>N/A</b>                                           |
| 50 to 64    | Men                             | 2,202 (10.3%)                           | 61 (8.7%)               | 36.10        | 1.30 (0.94-1.79)                 | 6,184 (10.2%)             | 13 (8.8%)               | 475.69        | 1.04 (0.51-2.11)                 | 13.18* (7.23-24.03)                                  | 0.80 (0.37-1.74)                                     |
|             | Women                           | 64 (0.3%)                               | 18 (2.6%)               | 3.56         | 0.13* (0.07-0.22)                | 88 (0.1%)                 | 9 (6.1%)                | 9.78          | 0.02* (0.01-0.05)                | 2.75** (1.16-6.52)                                   | 0.17* (0.06-0.45)                                    |
|             | <b>Subtotal</b>                 | <b>2,267 (10.6%)</b>                    | <b>79 (11.2%)</b>       | <b>28.70</b> | <b>N/A</b>                       | <b>6,583 (10.9%)</b>      | <b>19 (12.8%)</b>       | <b>346.47</b> | <b>N/A</b>                       | <b>12.07* (7.30-19.97)</b>                           | <b>N/A</b>                                           |
| 65 and over | Men                             | 271 (1.3%)                              | 11 (1.6%)               | 24.64        | 0.89 (0.47-1.67)                 | 718 (1.2%)                | 4 (2.7%)                | 179.50        | 0.39** (0.13-1.16)               | 7.29* (2.30-23.08)                                   | 0.44 (0.13-1.55)                                     |
|             | Women                           | 11 (0.1%)                               | 5 (0.7%)                | 2.20         | 0.08* (0.03-0.23)                | 7 (0.0%)                  | 0 (0.0%)                | N/A           | N/A                              | N/A                                                  | N/A                                                  |
|             | <b>Subtotal</b>                 | <b>283 (1.3%)</b>                       | <b>16 (2.3%)</b>        | <b>17.69</b> | <b>N/A</b>                       | <b>766 (1.3%)</b>         | <b>4 (2.7%)</b>         | <b>191.50</b> | <b>N/A</b>                       | <b>10.83* (3.59-32.67)</b>                           | <b>N/A</b>                                           |

<sup>1</sup> Transgender people includes transgender men, transgender women and those who identified as non-binary and was only available for the national gender breakdown to avoid small number masking, as required by UKHSA data request policy.

\* p-value<0.01

\*\*p-value<0.1

**Table 2.** Distribution of the number of PrEP users and PrEP need (via the recent new HIV diagnosis proxy) in England during the pre- (PrEP Impact Trial – October 2017 to February 2020) and post-commissioning (2021) period of PrEP by ethnicity and gender

| Ethnicity                   | Gender          | Pre-commissioning (Oct 2017 – Feb 2020) |                         |              |                                  | Post-commissioning (2021) |                         |               |                                  | Pre- to post-commissioning comparisons within groups | Pre- to post-commissioning comparisons across groups |
|-----------------------------|-----------------|-----------------------------------------|-------------------------|--------------|----------------------------------|---------------------------|-------------------------|---------------|----------------------------------|------------------------------------------------------|------------------------------------------------------|
|                             |                 | PrEP users N (%)                        | Recent new HIV dx N (%) | PnR          | PnR relative difference (95% CI) | PrEP users N (%)          | Recent new HIV dx N (%) | PnR           | PnR relative difference (95% CI) | PnR relative difference (95% CI)                     | PnR relative difference (95% CI)                     |
| White                       | Men             | 15,669 (73.6%)                          | 397 (56.5%)             | 39.47        | Baseline group                   | 41,765 (69.2%)            | 68 (45.9%)              | 614.19        | Baseline group                   | 15.56* (12.02-20.14)                                 | Baseline group                                       |
|                             | Women           | 367 (1.7%)                              | 58 (8.3%)               | 6.33         | 0.16* (0.12-0.22)                | 714 (1.2%)                | 9 (6.1%)                | 79.33         | 0.13* (0.06-0.26)                | 12.54* (6.14-25.59)                                  | 0.81 (0.38-1.72)                                     |
|                             | <b>Subtotal</b> | <b>16,061 (75.4%)</b>                   | <b>455 (64.7%)</b>      | <b>35.30</b> | <b>N/A</b>                       | <b>44,106 (73.0%)</b>     | <b>78 (52.7%)</b>       | <b>565.46</b> | <b>N/A</b>                       | <b>16.02* (12.59-20.38)</b>                          | <b>N/A</b>                                           |
| Black African               | Men             | 339 (1.6%)                              | 27 (3.8%)               | 12.56        | 0.32* (0.21-0.48)                | 1,050 (1.7%)              | 8 (5.4%)                | 131.25        | 0.21* (0.10-0.45)                | 10.45* (4.70-23.23)                                  | 0.67 (0.29-1.55)                                     |
|                             | Women           | 36 (0.2%)                               | 18 (2.6%)               | 2.00         | 0.05* (0.03-0.09)                | 42 (0.1%)                 | 8 (5.4%)                | 5.25          | 0.01* (0.00-0.02)                | 2.63** (1.02-6.75)                                   | 0.17* (0.06-0.45)                                    |
|                             | <b>Subtotal</b> | <b>376 (1.8%)</b>                       | <b>45 (6.4%)</b>        | <b>8.36</b>  | <b>N/A</b>                       | <b>1,131 (1.9%)</b>       | <b>16 (10.8%)</b>       | <b>70.69</b>  | <b>N/A</b>                       | <b>8.46* (4.73-15.14)</b>                            | <b>N/A</b>                                           |
| Black Caribbean             | Men             | 341 (1.6%)                              | 0 (0.0%)                | N/A          | N/A                              | 964 (1.6%)                | 0 (0.0%)                | N/A           | N/A                              | N/A                                                  | N/A                                                  |
|                             | Women           | 9 (0.0%)                                | 0 (0.0%)                | N/A          | N/A                              | 19 (0.0%)                 | 0 (0.0%)                | N/A           | N/A                              | N/A                                                  | N/A                                                  |
|                             | <b>Subtotal</b> | <b>350 (1.6%)</b>                       | <b>0 (0.0%)</b>         | <b>N/A</b>   | <b>N/A</b>                       | <b>996 (1.6%)</b>         | <b>0 (0.0%)</b>         | <b>N/A</b>    | <b>N/A</b>                       | <b>N/A</b>                                           | <b>N/A</b>                                           |
| Black Other                 | Men             | 128 (0.6%)                              | 18 (2.6%)               | 7.11         | 0.18* (0.11-0.30)                | 336 (0.6%)                | 4 (2.7%)                | 84.00         | 0.14* (0.05-0.38)                | 11.81* (3.92-35.58)                                  | 0.76 (0.24-2.36)                                     |
|                             | Women           | 6 (0.0%)                                | 8 (1.1%)                | 0.75         | 0.02* (0.01-0.06)                | 13 (0.0%)                 | 4 (2.7%)                | 3.25          | 0.01* (0.00-0.02)                | 4.33** (0.93-20.24)                                  | 0.28 (0.06-1.33)                                     |
|                             | <b>Subtotal</b> | <b>134 (0.6%)</b>                       | <b>26 (3.7%)</b>        | <b>5.15</b>  | <b>N/A</b>                       | <b>358 (0.6%)</b>         | <b>6 (4.1%)</b>         | <b>59.67</b>  | <b>N/A</b>                       | <b>11.58* (4.66-28.75)</b>                           | <b>N/A</b>                                           |
| Asian                       | Men             | 1,041 (4.9%)                            | 46 (6.5%)               | 22.63        | 0.57* (0.42-0.78)                | 4,413 (7.3%)              | 9 (6.1%)                | 490.33        | 0.80 (0.40-1.60)                 | 21.67* (10.57-44.41)                                 | 1.39 (0.65-2.98)                                     |
|                             | Women           | 46 (0.2%)                               | 4 (0.6%)                | 11.50        | 0.29** (0.10-0.81)               | 86 (0.1%)                 | 0 (0.0%)                | N/A           | N/A                              | N/A                                                  | N/A                                                  |
|                             | <b>Subtotal</b> | <b>1,092 (5.1%)</b>                     | <b>50 (7.1%)</b>        | <b>21.84</b> | <b>N/A</b>                       | <b>4,616 (7.6%)</b>       | <b>9 (6.1%)</b>         | <b>512.89</b> | <b>N/A</b>                       | <b>23.48* (11.51-47.90)</b>                          | <b>N/A</b>                                           |
| Mixed/ other                | Men             | 1,646 (7.7%)                            | 64 (9.1%)               | 25.72        | 0.65* (0.50-0.85)                | 4,675 (7.7%)              | 14 (9.5%)               | 333.93        | 0.54** (0.31-0.97)               | 12.98* (7.26-23.21)                                  | 0.83 (0.44-1.58)                                     |
|                             | Women           | 87 (0.4%)                               | 5 (0.7%)                | 17.40        | 0.44** (0.18-1.09)               | 175 (0.3%)                | 4 (2.7%)                | 43.75         | 0.07* (0.03-0.20)                | 2.51 (0.66-9.60)                                     | 0.16* (0.04-0.63)                                    |
|                             | <b>Subtotal</b> | <b>1,740 (8.2%)</b>                     | <b>69 (9.8%)</b>        | <b>25.22</b> | <b>N/A</b>                       | <b>4,960 (8.2%)</b>       | <b>17 (11.5%)</b>       | <b>291.76</b> | <b>N/A</b>                       | <b>11.57* (6.79-19.73)</b>                           | <b>N/A</b>                                           |
| Not stated                  | Men             | 1,462 (6.9%)                            | 49 (7.0%)               | 29.84        | 0.76** (0.56-1.02)               | 3,966 (6.6%)              | 24 (16.2%)              | 165.25        | 0.27* (0.17-0.43)                | 5.54* (3.39-9.06)                                    | 0.36* (0.20-0.62)                                    |
|                             | Women           | 72 (0.3%)                               | 9 (1.3%)                | 8.00         | 0.20* (0.10-0.41)                | 149 (0.2%)                | 4 (2.7%)                | 37.25         | 0.06* (0.02-0.17)                | 4.66** (1.39-15.63)                                  | 0.30** (0.09-1.03)                                   |
|                             | <b>Subtotal</b> | <b>1,539 (7.2%)</b>                     | <b>58 (8.3%)</b>        | <b>26.53</b> | <b>N/A</b>                       | <b>4,217 (7.0%)</b>       | <b>22 (14.9%)</b>       | <b>191.68</b> | <b>N/A</b>                       | <b>7.22* (4.41-11.84)</b>                            | <b>N/A</b>                                           |
| Latin American <sup>2</sup> | Men             | 714 (3.4%)                              | 24 (3.4%)               | 29.75        | 0.75 (0.50-1.15)                 | 2,459 (4.1%)              | 4 (2.7%)                | 614.75        | 1.00 (0.36-2.75)                 | 20.67* (7.15-59.76)                                  | 1.33 (0.45-3.96)                                     |
|                             | Women           | 81 (0.4%)                               | 4 (0.6%)                | 20.25        | 0.51 (0.19-1.41)                 | 218 (0.4%)                | 4 (2.7%)                | 54.50         | 0.09* (0.03-0.25)                | 2.69 (0.66-11.02)                                    | 0.17** (0.04-0.72)                                   |
|                             | <b>Subtotal</b> | <b>796 (3.7%)</b>                       | <b>24 (3.4%)</b>        | <b>33.17</b> | <b>N/A</b>                       | <b>2,702 (4.5%)</b>       | <b>4 (2.7%)</b>         | <b>675.50</b> | <b>N/A</b>                       | <b>20.37* (7.05-58.88)</b>                           | <b>N/A</b>                                           |

<sup>2</sup> Latin American is not an ethnicity readily available in the GUMCAD and HARS datasets and was derived from the attendee's country of birth (Belize, Costa Rica, El Salvador, Guatemala, Honduras, Mexico, Nicaragua, Panama, Argentina, Bolivia, Bouvet, Brazil, Chile, Colombia, Ecuador, Falkland Islands, French Guiana, Guyana, Paraguay, Peru, South Georgia and the South Sandwich Islands, Suriname, Uruguay, Venezuela)

\* p-value<0.01

\*\* p-value<0.1

**Table 3.** Distribution of the number of PrEP users and PrEP need (via the recent new HIV diagnosis proxy) in England during the pre- (PrEP Impact Trial – October 2017 to February 2020) and post-commissioning (2021) period of PrEP by region of residence and gender.

| Region                     | Gender          | Pre-commissioning (Oct 2017 – Feb 2020) |                         |              |                                  | Post-commissioning (2021) |                         |               |                                  | Pre- to post-commissioning comparisons within groups | Pre- to post-commissioning comparisons across groups |
|----------------------------|-----------------|-----------------------------------------|-------------------------|--------------|----------------------------------|---------------------------|-------------------------|---------------|----------------------------------|------------------------------------------------------|------------------------------------------------------|
|                            |                 | PrEP users N (%)                        | Recent new HIV dx N (%) | PnR          | PnR relative difference (95% CI) | PrEP users N (%)          | Recent new HIV dx N (%) | PnR           | PnR relative difference (95% CI) | PnR relative difference (95% CI)                     | PnR relative difference (95% CI)                     |
| London                     | Men             | 10,927 (52.1%)                          | 287 (40.8%)             | 38.07        | Baseline group                   | 32,708 (55.2%)            | 48 (32.4%)              | 681.42        | Baseline group                   | 17.90* (13.17-24.31)                                 | Baseline group                                       |
|                            | Women           | 330 (1.6%)                              | 34 (4.8%)               | 9.71         | 0.25* (0.18-0.37)                | 668 (1.1%)                | 8 (5.4%)                | 83.50         | 0.12* (0.06-0.26)                | 8.60* (3.94-18.79)                                   | 0.48** (0.21-1.11)                                   |
|                            | <b>Subtotal</b> | <b>11,275 (53.8%)</b>                   | <b>321 (45.7%)</b>      | <b>35.12</b> | <b>N/A</b>                       | <b>33,569 (56.6%)</b>     | <b>56 (37.8%)</b>       | <b>599.45</b> | <b>N/A</b>                       | <b>17.07* (12.84-22.69)</b>                          | <b>N/A</b>                                           |
| Midlands & East of England | Men             | 2,518 (12.0%)                           | 97 (13.8%)              | 25.96        | 0.68* (0.54-0.86)                | 5,816 (9.8%)              | 27 (18.2%)              | 215.41        | 0.32* (0.20-0.51)                | 8.30* (5.40-12.74)                                   | 0.46* (0.27-0.79)                                    |
|                            | Women           | 92 (0.4%)                               | 26 (3.7%)               | 3.54         | 0.09* (0.06-0.15)                | 152 (0.3%)                | 7 (4.7%)                | 21.71         | 0.03* (0.01-0.07)                | 6.14* (2.56-14.70)                                   | 0.34** (0.14-0.87)                                   |
|                            | <b>Subtotal</b> | <b>2,615 (12.5%)</b>                    | <b>123 (17.5%)</b>      | <b>21.26</b> | <b>N/A</b>                       | <b>6,726 (11.3%)</b>      | <b>34 (23.0%)</b>       | <b>197.82</b> | <b>N/A</b>                       | <b>9.30* (6.35-13.64)</b>                            | <b>N/A</b>                                           |
| North of England           | Men             | 3,274 (15.6%)                           | 139 (19.8%)             | 23.55        | 0.62* (0.50-0.76)                | 9,231 (15.6%)             | 27 (18.2%)              | 341.89        | 0.50* (0.31-0.80)                | 14.52* (9.59-21.96)                                  | 0.81 (0.48-1.36)                                     |
|                            | Women           | 84 (0.4%)                               | 23 (3.3%)               | 3.65         | 0.10* (0.06-0.15)                | 180 (0.3%)                | 9 (6.1%)                | 20.00         | 0.03* (0.01-0.06)                | 5.48* (2.43-12.35)                                   | 0.31* (0.13-0.73)                                    |
|                            | <b>Subtotal</b> | <b>3,366 (16.1%)</b>                    | <b>162 (23.0%)</b>      | <b>20.78</b> | <b>N/A</b>                       | <b>9,858 (16.6%)</b>      | <b>36 (24.3%)</b>       | <b>273.83</b> | <b>N/A</b>                       | <b>13.18* (9.16-18.95)</b>                           | <b>N/A</b>                                           |
| South of England           | Men             | 3,595 (17.2%)                           | 78 (11.1%)              | 46.09        | 1.21 (0.94-1.56)                 | 8,454 (14.3%)             | 24 (16.2%)              | 352.25        | 0.52* (0.32-0.84)                | 7.64* (4.83-12.10)                                   | 0.43* (0.25-0.74)                                    |
|                            | Women           | 94 (0.4%)                               | 19 (2.7%)               | 4.95         | 0.13* (0.08-0.22)                | 179 (0.3%)                | 4 (2.7%)                | 44.75         | 0.07* (0.02-0.18)                | 9.05* (2.99-27.36)                                   | 0.51 (0.16-1.59)                                     |
|                            | <b>Subtotal</b> | <b>3,700 (17.7%)</b>                    | <b>97 (13.8%)</b>       | <b>38.14</b> | <b>N/A</b>                       | <b>9,147 (15.4%)</b>      | <b>22 (14.9%)</b>       | <b>415.77</b> | <b>N/A</b>                       | <b>10.90* (6.85-17.34)</b>                           | <b>N/A</b>                                           |

\* p-value&lt;0.01

\*\* p-value&lt;0.1
