# Supplementary material
Source: HighWire-hosted journal article supplement (https://sti.bmj.com/content/100/3/166)
Supplement: inline-supplementary-material-3 [file inline-supplementary-material-3.pdf]

**Supplementary material 3****Table 1.** Distribution of the number of PrEP users and PrEP need as defined by UKHSA (1) in England during the post-commissioning (2021) period of PrEP by age and gender (including gender and sexual orientation minorities)

| Age         | Gender                          | Post-commissioning (2021) |                                     |             |                                  |
|-------------|---------------------------------|---------------------------|-------------------------------------|-------------|----------------------------------|
|             |                                 | PrEP users (N, %)         | SSHS patients with PrEP need (N, %) | PnR         | PnR relative difference (95% CI) |
| Overall     | <b>Total</b>                    | <b>60,384 (100.0%)</b>    | <b>87,828 (100.0%)</b>              | <b>0.69</b> | <b>N/A</b>                       |
|             | Men, of which:                  | 57,169 (94.7%)            | 80,877 (92.1%)                      | 0.71        | Baseline group                   |
|             | <i>MSM</i>                      | 49,543 (82.0%)            | 70,076 (79.8%)                      | 0.71        | N/A                              |
|             | <i>Heterosexual men</i>         | 7,626 (12.6%)             | 10,801 (12.3%)                      | 0.71        | N/A                              |
|             | Women                           | 1,198 (2.0%)              | 3,901 (4.4%)                        | 0.31        | 0.43* (0.41-0.46)                |
|             | Transgender people <sup>1</sup> | 527 (0.9%)                | 847 (1.0%)                          | 0.62        | N/A                              |
| 16 to 24    | Men                             | 8,691 (14.4%)             | 14,252 (16.2%)                      | 0.61        | Baseline group                   |
|             | Women                           | 261 (0.4%)                | 1,159 (1.3%)                        | 0.23        | 0.37* (0.32-0.42)                |
|             | <b>Subtotal</b>                 | <b>9,313 (15.4%)</b>      | <b>16,088 (18.3%)</b>               | <b>0.58</b> | <b>N/A</b>                       |
| 25 to 34    | Men                             | 23,603 (39.1%)            | 33,354 (38.0%)                      | 0.71        | 1.16* (1.12-1.20)                |
|             | Women                           | 492 (0.8%)                | 1,477 (1.7%)                        | 0.33        | 0.55* (0.49-0.61)                |
|             | <b>Subtotal</b>                 | <b>24,830 (41.1%)</b>     | <b>35,956 (41.0%)</b>               | <b>0.69</b> | <b>N/A</b>                       |
| 35 to 49    | Men                             | 17,972 (29.8%)            | 24,011 (27.3%)                      | 0.75        | 1.23* (1.19-1.27)                |
|             | Women                           | 348 (0.6%)                | 995 (1.1%)                          | 0.35        | 0.57* (0.51-0.65)                |
|             | <b>Subtotal</b>                 | <b>18,889 (31.3%)</b>     | <b>25,800 (29.4%)</b>               | <b>0.73</b> | <b>N/A</b>                       |
| 50 to 64    | Men                             | 6,184 (10.2%)             | 8,180 (9.3%)                        | 0.76        | 1.24* (1.19-1.29)                |
|             | Women                           | 88 (0.1%)                 | 225 (0.3%)                          | 0.39        | 0.64* (0.50-0.82)                |
|             | <b>Subtotal</b>                 | <b>6,583 (10.9%)</b>      | <b>8,793 (10.0%)</b>                | <b>0.75</b> | <b>N/A</b>                       |
| 65 and over | Men                             | 718 (1.2%)                | 1,072 (1.2%)                        | 0.67        | 1.10** (1.00-1.21)               |
|             | Women                           | 7 (0.0%)                  | 26 (0.0%)                           | 0.27        | 0.44** (0.19-1.02)               |
|             | <b>Subtotal</b>                 | <b>766 (1.3%)</b>         | <b>1,161 (1.3%)</b>                 | <b>0.66</b> | <b>N/A</b>                       |

<sup>1</sup> Transgender people includes transgender men, transgender women and those who identified as non-binary and was only available for the national gender breakdown to avoid small number masking, as required by UKHSA data request policy.

\* p-value<0.01

\*\*p-value<0.1

**Table 2.** Distribution of the number of PrEP users and PrEP need as defined by UKHSA (1) in England during the post-commissioning (2021) period of PrEP by ethnicity and gender

| Ethnicity                        | Gender          | Post-commissioning (2021) |                                     |             |                                  |
|----------------------------------|-----------------|---------------------------|-------------------------------------|-------------|----------------------------------|
|                                  |                 | PrEP users (N, %)         | SSHS patients with PrEP need (N, %) | PnR         | PnR relative difference (95% CI) |
| White                            | Men             | 41,765 (69.2%)            | 58,431 (66.5%)                      | 0.71        | Baseline group                   |
|                                  | Women           | 714 (1.2%)                | 2,382 (2.7%)                        | 0.30        | 0.42* (0.39-0.46)                |
|                                  | <b>Subtotal</b> | <b>44,106 (73.0%)</b>     | <b>63,190 (71.9%)</b>               | <b>0.70</b> | <b>N/A</b>                       |
| Black African                    | Men             | 1,050 (1.7%)              | 1,768 (2.0%)                        | 0.59        | 0.83* (0.77-0.90)                |
|                                  | Women           | 42 (0.1%)                 | 278 (0.3%)                          | 0.15        | 0.21* (0.15-0.29)                |
|                                  | <b>Subtotal</b> | <b>1,131 (1.9%)</b>       | <b>2,130 (2.4%)</b>                 | <b>0.53</b> | <b>N/A</b>                       |
| Black Caribbean                  | Men             | 964 (1.6%)                | 1,562 (1.8%)                        | 0.62        | 0.86* (0.80-0.94)                |
|                                  | Women           | 19 (0.0%)                 | 82 (0.1%)                           | 0.23        | 0.32* (0.20-0.53)                |
|                                  | <b>Subtotal</b> | <b>996 (1.6%)</b>         | <b>1,663 (1.9%)</b>                 | <b>0.60</b> | <b>N/A</b>                       |
| Black Other                      | Men             | 336 (0.6%)                | 538 (0.6%)                          | 0.62        | 0.87** (0.76-1.00)               |
|                                  | Women           | 13 (0.0%)                 | 55 (0.1%)                           | 0.24        | 0.33* (0.18-0.61)                |
|                                  | <b>Subtotal</b> | <b>358 (0.6%)</b>         | <b>605 (0.7%)</b>                   | <b>0.59</b> | <b>N/A</b>                       |
| Asian                            | Men             | 4,413 (7.3%)              | 6,033 (6.9%)                        | 0.73        | 1.02 (0.98-1.07)                 |
|                                  | Women           | 86 (0.1%)                 | 208 (0.2%)                          | 0.41        | 0.58* (0.45-0.74)                |
|                                  | <b>Subtotal</b> | <b>4,616 (7.6%)</b>       | <b>6,425 (7.3%)</b>                 | <b>0.72</b> | <b>N/A</b>                       |
| Mixed/ other                     | Men             | 4,675 (7.7%)              | 6,428 (7.3%)                        | 0.73        | 1.02 (0.98-1.06)                 |
|                                  | Women           | 175 (0.3%)                | 377 (0.4%)                          | 0.46        | 0.65* (0.54-0.78)                |
|                                  | <b>Subtotal</b> | <b>4,960 (8.2%)</b>       | <b>6,973 (7.9%)</b>                 | <b>0.71</b> | <b>N/A</b>                       |
| Not stated                       | Men             | 3,966 (6.6%)              | 6,117 (7.0%)                        | 0.65        | 0.91* (0.87-0.95)                |
|                                  | Women           | 149 (0.2%)                | 519 (0.6%)                          | 0.29        | 0.40* (0.33-0.48)                |
|                                  | <b>Subtotal</b> | <b>4,217 (7.0%)</b>       | <b>6,842 (7.8%)</b>                 | <b>0.62</b> | <b>N/A</b>                       |
| Latin American flag <sup>2</sup> | Men             | 2,459 (4.1%)              | 3,032 (3.5%)                        | 0.81        | 1.13* (1.07-1.20)                |
|                                  | Women           | 218 (0.4%)                | 325 (0.4%)                          | 0.67        | 0.94 (0.79-1.11)                 |
|                                  | <b>Subtotal</b> | <b>2,702 (4.5%)</b>       | <b>3,398 (3.9%)</b>                 | <b>0.80</b> | <b>N/A</b>                       |

<sup>2</sup> Latin American is not an ethnicity readily available in the GUMCAD and HARS datasets and was derived from the attendee's country of birth (Belize, Costa Rica, El Salvador, Guatemala, Honduras, Mexico, Nicaragua, Panama, Argentina, Bolivia, Bouvet, Brazil, Chile, Colombia, Ecuador, Falkland Islands, French Guiana, Guyana, Paraguay, Peru, South Georgia and the South Sandwich Islands, Suriname, Uruguay, Venezuela)

\* p-value<0.01

\*\* p-value<0.1

**Table 3.** Distribution of the number of PrEP users and PrEP need as defined by UKHSA (1) in England during the post-commissioning (2021) period of PrEP by region of residence and gender. \*p-value<0.01

| Region                     | Gender          | Post-commissioning (2021) |                                     |             |                                  |
|----------------------------|-----------------|---------------------------|-------------------------------------|-------------|----------------------------------|
|                            |                 | PrEP users (N, %)         | SSHS patients with PrEP need (N, %) | PnR         | PnR relative difference (95% CI) |
| London                     | Men             | 32,708 (55.2%)            | 40,963 (47.6%)                      | 0.80        | Baseline group                   |
|                            | Women           | 668 (1.1%)                | 1,524 (1.8%)                        | 0.44        | 0.55* (0.50-0.60)                |
|                            | <b>Subtotal</b> | <b>33,569 (56.6%)</b>     | <b>42,774 (49.7%)</b>               | <b>0.78</b> | <b>N/A</b>                       |
| Midlands & East of England | Men             | 5,816 (9.8%)              | 10,393 (12.1%)                      | 0.56        | 0.70* (0.68-0.73)                |
|                            | Women           | 152 (0.3%)                | 773 (0.9%)                          | 0.20        | 0.25* (0.21-0.29)                |
|                            | <b>Subtotal</b> | <b>6,726 (11.3%)</b>      | <b>12,337 (14.3%)</b>               | <b>0.55</b> | <b>N/A</b>                       |
| North of England           | Men             | 9,231 (15.6%)             | 15,093 (17.5%)                      | 0.61        | 0.77* (0.74-0.79)                |
|                            | Women           | 180 (0.3%)                | 824 (1.0%)                          | 0.22        | 0.27* (0.23-0.32)                |
|                            | <b>Subtotal</b> | <b>9,858 (16.6%)</b>      | <b>16,587 (19.3%)</b>               | <b>0.59</b> | <b>N/A</b>                       |
| South of England           | Men             | 8,454 (14.3%)             | 12,924 (15.0%)                      | 0.65        | 0.82* (0.79-0.85)                |
|                            | Women           | 179 (0.3%)                | 704 (0.8%)                          | 0.25        | 0.32* (0.27-0.38)                |
|                            | <b>Subtotal</b> | <b>9,147 (15.4%)</b>      | <b>14,385 (16.7%)</b>               | <b>0.64</b> | <b>N/A</b>                       |

**Table 4.** Distribution of the number of PrEP users and PrEP need as defined by UKHSA (1) in England during the post-commissioning (2021) period of PrEP by region of residence and ethnicity. Here Black other includes people of Black Caribbean ethnicity.

| Region                     | Ethnicity       | Post-commissioning (2021) |                                     |             |                    |
|----------------------------|-----------------|---------------------------|-------------------------------------|-------------|--------------------|
|                            |                 | PrEP users (N, %)         | SSHS patients with PrEP need (N, %) | PnR         | PnR ratio (95% CI) |
| London                     | White           | 22,371 (37.7%)            | 27,489 (31.9%)                      | 0.81        | Baseline group     |
|                            | Black African   | 843 (1.4%)                | 1,375 (1.6%)                        | 0.61        | 0.75* (0.69-0.82)  |
|                            | Black other     | 1,032 (1.7%)              | 1,635 (1.9%)                        | 0.63        | 0.78* (0.72-0.84)  |
|                            | Asian           | 3,145 (5.3%)              | 3,988 (4.6%)                        | 0.79        | 0.97 (0.92-1.02)   |
|                            | Mixed/other     | 3,594 (6.1%)              | 4,682 (5.4%)                        | 0.77        | 0.94** (0.90-0.99) |
|                            | Not stated      | 2,584 (4.4%)              | 3,605 (4.2%)                        | 0.72        | 0.88* (0.83-0.93)  |
|                            | <b>Subtotal</b> | <b>33,569 (56.6%)</b>     | <b>42,774 (49.7%)</b>               | <b>0.78</b> | <b>N/A</b>         |
| Midlands & East of England | White           | 5,285 (8.9%)              | 9,261 (10.8%)                       | 0.57        | 0.70* (0.68-0.73)  |
|                            | Black African   | 99 (0.2%)                 | 301 (0.3%)                          | 0.33        | 0.40* (0.32-0.51)  |
|                            | Black other     | 119 (0.2%)                | 262 (0.3%)                          | 0.45        | 0.56* (0.45-0.69)  |
|                            | Asian           | 478 (0.8%)                | 876 (1.0%)                          | 0.55        | 0.67* (0.60-0.75)  |
|                            | Mixed/other     | 316 (0.5%)                | 628 (0.7%)                          | 0.50        | 0.62* (0.54-0.71)  |
|                            | Not stated      | 429 (0.7%)                | 1,009 (1.2%)                        | 0.43        | 0.52* (0.47-0.59)  |
|                            | <b>Subtotal</b> | <b>6,726 (11.3%)</b>      | <b>12,337 (14.3%)</b>               | <b>0.55</b> | <b>N/A</b>         |
| North of England           | White           | 8,034 (13.5%)             | 13,400 (15.6%)                      | 0.60        | 0.74* (0.71-0.76)  |
|                            | Black African   | 102 (0.2%)                | 243 (0.3%)                          | 0.42        | 0.52* (0.41-0.65)  |
|                            | Black other     | 107 (0.2%)                | 191 (0.2%)                          | 0.56        | 0.69* (0.54-0.87)  |
|                            | Asian           | 502 (0.8%)                | 816 (0.9%)                          | 0.62        | 0.76* (0.68-0.85)  |
|                            | Mixed/other     | 503 (0.8%)                | 814 (0.9%)                          | 0.62        | 0.76* (0.68-0.85)  |
|                            | Not stated      | 610 (1.0%)                | 1,123 (1.3%)                        | 0.54        | 0.67* (0.60-0.74)  |
|                            | <b>Subtotal</b> | <b>9,858 (16.6%)</b>      | <b>16,587 (19.3%)</b>               | <b>0.59</b> | <b>N/A</b>         |
| South of England           | White           | 7,646 (12.9%)             | 11,846 (13.8%)                      | 0.65        | 0.79* (0.77-0.82)  |
|                            | Black African   | 69 (0.1%)                 | 176 (0.2%)                          | 0.39        | 0.48* (0.36-0.64)  |
|                            | Black other     | 80 (0.1%)                 | 144 (0.2%)                          | 0.56        | 0.68* (0.52-0.90)  |
|                            | Asian           | 403 (0.7%)                | 613 (0.7%)                          | 0.66        | 0.81* (0.71-0.92)  |
|                            | Mixed/other     | 463 (0.8%)                | 718 (0.8%)                          | 0.64        | 0.79* (0.70-0.89)  |
|                            | Not stated      | 486 (0.8%)                | 888 (1.0%)                          | 0.55        | 0.67* (0.60-0.75)  |
|                            | <b>Subtotal</b> | <b>9,147 (15.4%)</b>      | <b>14,385 (16.7%)</b>               | <b>0.64</b> | <b>N/A</b>         |

\* p-value<0.01

\*\* p-value<0.1

**Table 5.** Distribution of the number of PrEP users and PrEP need as defined by UKHSA (1) in England during the post-commissioning (2021) period of PrEP by Index of Multiple Deprivation (IMD) and gender

| IMD                                 | Gender          | Post-commissioning (2021) |                                     |             |                                  |
|-------------------------------------|-----------------|---------------------------|-------------------------------------|-------------|----------------------------------|
|                                     |                 | PrEP users (N, %)         | SSHS patients with PrEP need (N, %) | PnR         | PnR relative difference (95% CI) |
| 5th Quintile<br>- least<br>deprived | Men             | 5,254 (8.7%)              | 7,798 (8.9%)                        | 0.67        | Baseline group                   |
|                                     | Women           | 92 (0.2%)                 | 347 (0.4%)                          | 0.27        | 0.39* (0.31-0.50)                |
|                                     | <b>Subtotal</b> | <b>5,624 (9.3%)</b>       | <b>8,569 (9.8%)</b>                 | <b>0.66</b> | <b>N/A</b>                       |
| 4th Quintile                        | Men             | 8,354 (13.8%)             | 12,036 (13.7%)                      | 0.69        | 1.03 (0.99-1.08)                 |
|                                     | Women           | 204 (0.3%)                | 562 (0.6%)                          | 0.36        | 0.54* (0.46-0.63)                |
|                                     | <b>Subtotal</b> | <b>8,925 (14.8%)</b>      | <b>13,157 (15.0%)</b>               | <b>0.68</b> | <b>N/A</b>                       |
| 3rd Quintile                        | Men             | 12,302 (20.4%)            | 17,076 (19.4%)                      | 0.72        | 1.07* (1.03-1.12)                |
|                                     | Women           | 219 (0.4%)                | 737 (0.8%)                          | 0.30        | 0.44* (0.38-0.51)                |
|                                     | <b>Subtotal</b> | <b>12,917 (21.4%)</b>     | <b>18,378 (20.9%)</b>               | <b>0.70</b> | <b>N/A</b>                       |
| 2nd Quintile                        | Men             | 18,768 (31.1%)            | 25,446 (29.0%)                      | 0.74        | 1.09* (1.05-1.14)                |
|                                     | Women           | 369 (0.6%)                | 1,079 (1.2%)                        | 0.34        | 0.51* (0.45-0.57)                |
|                                     | <b>Subtotal</b> | <b>19,628 (32.5%)</b>     | <b>27,258 (31.0%)</b>               | <b>0.72</b> | <b>N/A</b>                       |
| 1st Quintile -<br>most<br>deprived  | Men             | 11,512 (19.1%)            | 16,991 (19.3%)                      | 0.68        | 1.01 (0.96-1.05)                 |
|                                     | Women           | 295 (0.5%)                | 1,100 (1.3%)                        | 0.27        | 0.40* (0.35-0.45)                |
|                                     | <b>Subtotal</b> | <b>12,187 (20.2%)</b>     | <b>18,695 (21.3%)</b>               | <b>0.65</b> | <b>N/A</b>                       |
| Not<br>reported                     | Men             | 979 (1.6%)                | 1,530 (1.7%)                        | 0.64        | 0.95 (0.87-1.04)                 |
|                                     | Women           | 19 (0.0%)                 | 76 (0.1%)                           | 0.25        | 0.37* (0.22-0.61)                |
|                                     | <b>Subtotal</b> | <b>1,103 (1.8%)</b>       | <b>1,771 (2.0%)</b>                 | <b>0.62</b> | <b>N/A</b>                       |

\* p-value&lt;0.01

**References**

1. Routine commissioning of HIV pre-exposure prophylaxis (PrEP) in England: Monitoring and evaluation framework. London: UKHSA; 2022.
